# Supplementary figures and images for: Gels of zirconium phosphate in organic solvents and their use for the preparation of polymeric nanocomposites
Source: Royal Society of Chemistry journal article supplement (doi:10.1039/b506768e), 2005-01-01

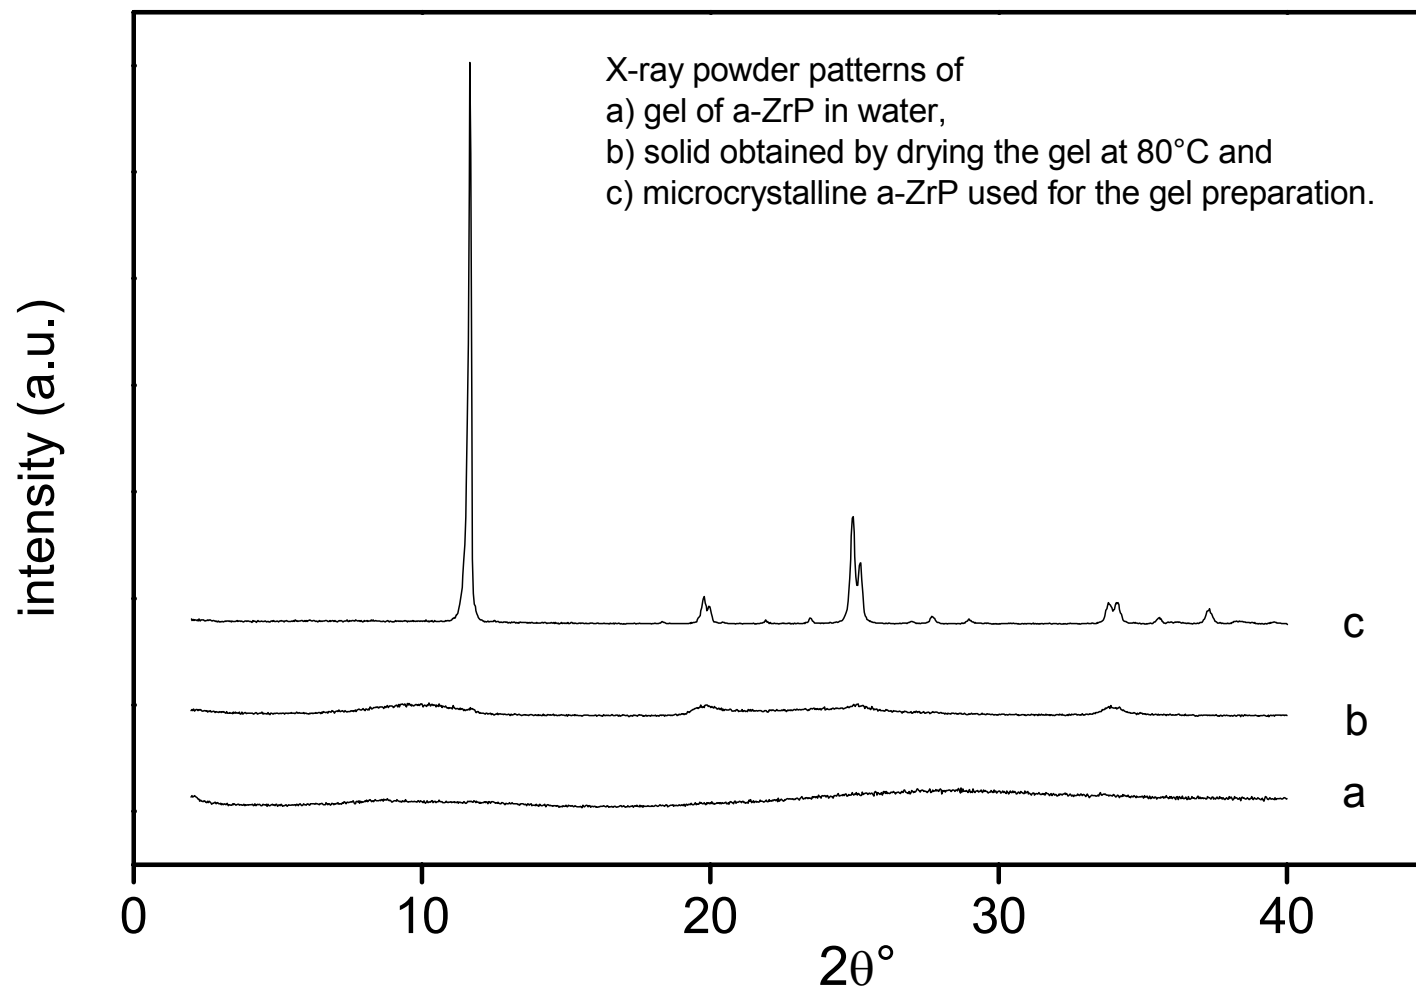

Supplement: b506768e.pdf [file b506768e.pdf]
